# Supplementary material
Source: Springer Nature journal article supplement (https://www.springermedizin.de/resource/supplementary/13024_2011_329_MOESM12_ESM.pdf/9643764)

**A**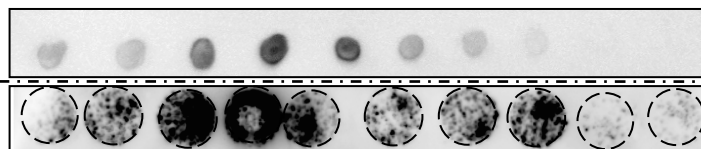

Fraction 1 2 3 4 5 6 7 8 9 10

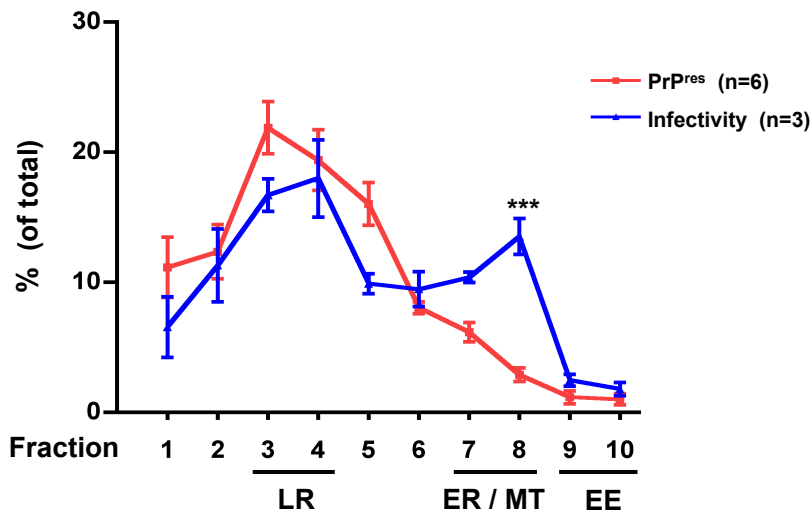**B**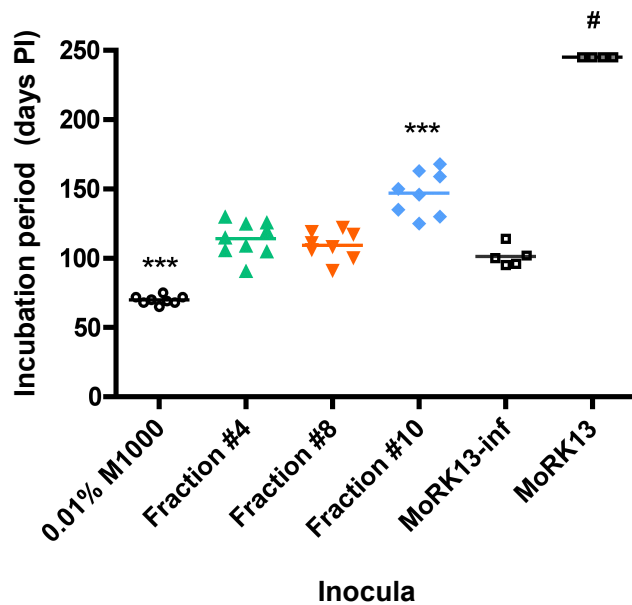

Supplement: MOESM12 [file 9643764]
